# Supplementary material for: All Is Not Loss: Plant Biodiversity in the Anthropocene
Source: PLoS One. 2012 Jan 17;7(1):e30535. doi: 10.1371/journal.pone.0030535 (PMC3260302; doi:10.1371/journal.pone.0030535)
Supplement: Appendix S2 — Global statistics (XLS) [file pone.0030535.s002.xls]

## Sheet: Sheet1
Ellis, E.C., Antill, E.C. and H. Kreft (in review): All is Not Loss: Plant Biodiversity in the Anthropocene. PLOSone
Appendix S2: Global statistics
								N = Native Species Richness
								ASR = Anthropogenic Species Richness = N - ASL + ASI								IS = Invasive Species
								ASL = Anthropogenic Species Loss								CS = Crop Species
								ASI = Anthropogenic Species Increase = IS + CS + OS								OS = Ornamental Species
Terrestrial Biosphere			Cell area	Population density	Land use			Habitat loss (HL)								ASR / N	ASL / N	ASI / N	(ASL + ASI) / N	IS / N	IS / ASI	OS / ASI	CS / ASI
(regional landscape cells)			km2	persons km-2	crops (%)	pasture (%)	urban (%)	(%)	N	ASR	ASL	ASI	IS	CS	OS	(%)	(%)	(%)	(%)	(%)	(%)	(%)	(%)
		median	7659	3.3984	0.0223256	0.158678	3.938e-05	0.279369	828.6	853.029	43.3846	66.7259	46.3606	11	0	1.04263	0.0524598	0.072527	0.13639	0.0624011	0.863968	0	0.0793771
		mean	7439.36	47.8601	0.118159	0.259898	0.00426663	0.29569	1064.66	1118.88	84.4987	138.719	90.2205	15.6153	32.8831	1.06293	0.0684319	0.131774	0.200206	0.0871202	0.792397	0.0793808	0.127805
		min	3896.56	0	0	0	0	0	0	0	0	0	0	0	0	0	0	0	0	0	0	0	0
		max	8330	3957.79	0.995083	1	0.82576	0.995	5120.8	4844.57	1163.43	1206.16	1040.56	79	400	4.31884	0.795971	3.32686	3.33488	0.366598	1	0.97592	0.849497
		SD	715.491	151.008	0.184764	0.277635	0.0199357	0.258345	785.376	805.676	118.704	174.038	109.921	17.0505	82.7796	0.146817	0.0751419	0.145135	0.17982	0.0760621	0.233671	0.20309	0.142865
		95per	7938	240.962	0.544454	0.807998	0.018264	0.734661	2709.64	2796.45	317.69	561.532	346.504	50	200	1.36741	0.201109	0.484219	0.611223	0.313441	1	0.634989	0.413999
		5per	5653.94	0	0	0	0	0	208.64	225.542	0	16.2966	15.9633	0	0	0.904115	0	0.0429169	0.0575728	0.0383472	0.243537	0	0
Medians, by category
Terrestrial Biosphere		Ice-free land area		Population density	Land use			Habitat loss (HL)								ASR / N	ASL / N	ASI / N	(ASL + ASI) / N	IS / N	IS / ASI	OS / ASI	CS / ASI
		106 km2	(%)	persons km-2	crops (%)	pasture (%)	urban (%)	(%)	N	ASR	ASL	ASI	IS	CS	OS	(%)	(%)	(%)	(%)	(%)	(%)	(%)	(%)
	GLOBAL	1.25018e+08	1	3.3984	0.0223256	0.158678	3.938e-05	0.279369	828.6	853.029	43.3846	66.7259	46.3606	11	0	1.04263	0.0524598	0.072527	0.13639	0.0624011	0.863968	0	0.0793771
	Anthropogenic	8.98546e+07	0.718731	11.0406	0.0737615	0.302695	0.00039524	0.418509	1007.5	1088.1	79.6587	86.86	57.0548	17	0	1.01353	0.0823441	0.071506	0.17618	0.0521023	0.768629	0	0.129731
	Wild	3.51638e+07	0.281269	0.0615778	0	0.000863485	0	0.00146168	439.2	473.748	0.0916959	32.0298	31.0513	0	0	1.07251	0.000209964	0.0733143	0.0749703	0.0714197	1	0	0
	Hotspots (Mittermeier et al. 2004)	2.13603e+07	0.170857	29.1459	0.123093	0.265955	0.00112255	0.399241	1738.7	1741.75	157.184	136.4	89.4952	29	0	1.00426	0.0986545	0.0831348	0.199986	0.0453818	0.745347	0	0.015155
Biogeographic Realms		Ice-free land area		Population density	Land use			Habitat loss (HL)								ASR / N	ASL / N	ASI / N	(ASL + ASI) / N	IS / N	IS / ASI	OS / ASI	CS / ASI
	Label	106 km2	(%)	persons km-2	crops (%)	pasture (%)	urban (%)	(%)	N	ASR	ASL	ASI	IS	CS	OS	(%)	(%)	(%)	(%)	(%)	(%)	(%)	(%)
	Neotropic	1.85869e+07	0.148673	3.79146	0.0293742	0.222893	0.0002307	0.231973	1984.7	2000.08	73.483	102.829	89.5999	13	0	1.02376	0.0480144	0.0507032	0.115722	0.0411371	0.874046	0	0.0976133
	Indo-Malay	7.96875e+06	0.0637406	153.936	0.321406	0.0371449	0.00214972	0.402839	1913.85	1892.46	170.219	147.626	86.1209	40	0	1.00675	0.115222	0.125634	0.23887	0.0414073	0.60968	0	0.220838
	Afrotropic	2.1035e+07	0.168256	11.1396	0.037614	0.364979	0.00013145	0.35726	1058.5	1050.43	73.4438	68.9603	49.3376	15	0	0.998361	0.0748953	0.0613047	0.143129	0.0456719	0.770247	0	0.205814
	Australasia	8.58269e+06	0.0686514	0.0240649	0.00885184	0.536088	0	0.418931	670.8	660.947	42.2413	38.0783	35.9812	0	0	0.998086	0.0650917	0.0616911	0.126602	0.060171	1	0	0
	Nearctic	1.83246e+07	0.146575	0.6826	0.0113636	0.0242895	4.6e-07	0.0536102	623.1	635.986	6.44009	46.1515	37.6168	6	0	1.07957	0.00768442	0.0852334	0.130529	0.0759946	0.950214	0	0.0246498
	Palearctic	5.05205e+07	0.404104	1.72252	0.00577246	0.109526	2.74e-06	0.19957	614.5	643.656	16.9858	47.3481	38.5076	3	0	1.07096	0.0292681	0.0778935	0.137592	0.0696617	0.9383	0	0.0401037
	Global	1.25018e+08	1	3.3984	0.0223256	0.158678	3.938e-05	0.279369	828.6	853.029	43.3846	66.7259	46.3606	11	0	1.04263	0.0524598	0.072527	0.13639	0.0624011	0.863968	0	0.0793771
Biomes (Olson et al., 2001)		Ice-free land area		Population density	Land use			Habitat loss (HL)								ASR / N	ASL / N	ASI / N	(ASL + ASI) / N	IS / N	IS / ASI	OS / ASI	CS / ASI
class	Label	106 km2	(%)	persons km-2	crops (%)	pasture (%)	urban (%)	(%)	N	ASR	ASL	ASI	IS	CS	OS	(%)	(%)	(%)	(%)	(%)	(%)	(%)	(%)
1	Tropical & subtropical moist broadleaf forests	1.8898e+07	0.151161	14.5044	0.0514157	0.0473421	0.000338805	0.1562	2343.15	2324.19	118.584	119.129	91.8832	20	0	1.01058	0.0496755	0.048113	0.101355	0.0392135	0.817324	0	0.129342
3	Tropical & subtropical coniferous forests	624778	0.00499749	34.6295	0.183254	0.224435	0.0022073	0.390668	1862	2041.53	171.037	289.879	246.254	27	0	1.0816	0.0898304	0.148883	0.247808	0.132252	0.899954	0	0.0727267
2	Tropical & subtropical dry broadleaf forests	2.69149e+06	0.0215288	86.4459	0.288764	0.0717339	0.00167231	0.46728	1524.8	1658.42	160.619	260.465	209.042	34	0	1.06853	0.123878	0.175086	0.309492	0.137095	0.817855	0	0.102817
12	Mediterranean forests, woodlands & shrub	2.92217e+06	0.0233739	33.6893	0.252667	0.288709	0.00286463	0.521961	1220.4	1208.05	172.263	184.882	104.938	40.5	0	1.00446	0.137235	0.126105	0.291503	0.0859864	0.686952	0	0.150091
5	Temperate coniferous forests	3.6639e+06	0.0293068	4.24612	0.0507206	0.0840619	0.00016543	0.177011	1110.7	1354.64	29.8243	247.25	231.59	10	0	1.20904	0.0269052	0.221789	0.254921	0.211326	0.956152	0	0.032454
4	Temperate broadleaf & mixed forests	1.21367e+07	0.0970797	53.4528	0.264057	0.15052	0.00666294	0.434973	1087.4	1488.92	108.964	535.998	326.998	33	200	1.3168	0.0924895	0.414679	0.524798	0.31145	0.666602	0.269137	0.0661478
7	Tropical & subtropical grasslands, savannas & shrublands	2.02155e+07	0.1617	7.49723	0.044759	0.440168	0.00012156	0.38095	1040.9	1016.4	80.5128	64.7899	47.2362	14	0	0.980832	0.0827017	0.0580473	0.14232	0.0453802	0.777779	0	0.202936
10	Montane grasslands & shrublands	4.98747e+06	0.0398939	3.83044	0.0109682	0.603685	0	0.457204	927.1	938.205	83.5555	75.0176	59.2985	10	0	0.981946	0.0986607	0.0730021	0.173586	0.0639613	0.863617	0	0.122039
9	Flooded grasslands & savannas	808178	0.00646447	8.65038	0.073444	0.341163	0.0001904	0.406242	912.05	966.213	60.5409	63.6932	42.3851	13	0	1.01817	0.0606438	0.0615423	0.134096	0.0464729	0.756702	0	0.199911
8	Temperate grasslands, savannas & shrublands	9.77814e+06	0.0782136	4.89115	0.249022	0.46243	0.00045423	0.660288	756.2	729.067	90.6825	54.5097	36.3481	17	0	0.964053	0.121517	0.0721139	0.196868	0.0480668	0.659866	0	0.271602
6	Boreal forests	1.43442e+07	0.114737	0.135379	0.0001678	0.0006633	0	0.00121434	545.35	586.311	0.108458	39.5065	38.3772	0	0	1.07191	0.000194394	0.0729865	0.0736327	0.0703718	1	0	0
13	Deserts & xeric shrublands	2.75852e+07	0.220649	0.406969	0.000553325	0.291323	0	0.281239	457.05	472.47	19.1823	31.8387	28.9181	0	0	1.05111	0.0356731	0.0699344	0.116674	0.0632713	1	0	0
11	Tundra	6.36257e+06	0.0508931	0.00511192	0	0	0	0	227.1	245.811	0	18.711	18.711	0	0	1.08235	0	0.0823521	0.0823782	0.0823326	1	0	0
	Global	1.25018e+08	1	3.3984	0.0223256	0.158678	3.938e-05	0.279369	828.6	853.029	43.3846	66.7259	46.3606	11	0	1.04263	0.0524598	0.072527	0.13639	0.0624011	0.863968	0	0.0793771
Anthromes (v2; Ellis et al., 2010)		Ice-free land area		Population density	Land use			Habitat loss (HL)								ASR / N	ASL / N	ASI / N	(ASL + ASI) / N	IS / N	IS / ASI	OS / ASI	CS / ASI
class	Label	106 km2	(%)	persons km-2	crops (%)	pasture (%)	urban (%)	(%)	N	ASR	ASL	ASI	IS	CS	OS	(%)	(%)	(%)	(%)	(%)	(%)	(%)	(%)
Dense Settlements
11	Urban	198137	0.00158486	493.332	0.162616	0.122771	0.227185	0.550904	1168.2	1683.64	161.515	766.944	339.645	18	400	1.46967	0.13523	0.589978	0.685346	0.290336	0.438665	0.521551	0.0313625
12	Mixed settlements	115699	0.000925454	207.865	0.166102	0.0692003	0.00322164	0.247328	1717.9	1975.25	94.9897	132.394	81.2483	38.5	0	1.04453	0.0597282	0.0934886	0.152913	0.0420709	0.591716	0	0.275975
Villages
21	Rice villages	2.65092e+06	0.0212043	369.314	0.530155	0.0417539	0.00750826	0.614759	1635.8	1656.46	368.181	310.408	84.8435	48	200	0.949373	0.209914	0.181016	0.42273	0.0438625	0.471505	0.42859	0.16061
22	Irrigated villages	1.34219e+06	0.010736	471.634	0.539016	0.103478	0.0151214	0.652899	1003.9	1279.01	157.53	381.014	135.024	47	200	1.29726	0.146753	0.448771	0.59058	0.15542	0.511429	0.329308	0.113858
23	Rainfed villages	2.71255e+06	0.0216972	247.396	0.424727	0.158319	0.00598144	0.566267	1254.5	1463.43	176.234	319.709	110.155	42	200	1.04883	0.148306	0.200003	0.401772	0.0631931	0.558673	0.285939	0.130085
24	Pastoral villages	103487	0.000827774	213.888	0.133571	0.352051	0.00570829	0.418981	1649.95	1897.04	119.7	287.356	77.9035	42	200	1.09446	0.0789758	0.168388	0.26307	0.0531009	0.342423	0.43693	0.143116
Croplands
31	Residential irrigated croplands	328909	0.00263088	74.0896	0.268634	0.317291	0.00920701	0.580255	888.25	1082.35	105.693	287.719	48.3619	39.5	200	1.24352	0.122848	0.347006	0.458811	0.0598419	0.242116	0.619719	0.0992551
32	Residential rainfed croplands	1.16607e+07	0.093272	67.7626	0.368516	0.19896	0.0050608	0.553566	1174.8	1471.22	170.709	329.841	126.015	35	200	1.0822	0.13832	0.233749	0.394006	0.082286	0.60147	0.247682	0.112062
33	Populated croplands	5.25454e+06	0.0420301	11.8419	0.382358	0.283935	0.00142282	0.653621	899.8	931.837	126.102	79.8974	44.6152	19	0	0.966891	0.134666	0.0840616	0.252589	0.0480064	0.667523	0	0.250759
34	Remote croplands	1.85003e+06	0.014798	1.61254	0.430123	0.291884	0.00027959	0.729731	712.1	665.488	107.498	52.8449	36.421	17	0	0.931807	0.155309	0.0860458	0.253404	0.0511511	0.701573	0	0.265091
Rangelands
41	Residential rangelands	7.73677e+06	0.061885	35.3194	0.0835412	0.441667	0.00130027	0.401274	1284.2	1324.01	116.758	100.925	65.7549	24	0	0.987923	0.0966268	0.0689927	0.17969	0.0455643	0.703998	0	0.214634
42	Populated rangelands	1.46338e+07	0.117053	6.61138	0.0425609	0.552309	0.00013812	0.437755	989.9	993.124	87.9477	72.6198	50.9008	14	0	0.985652	0.089256	0.0654863	0.169105	0.0487447	0.803394	0	0.174375
43	Remote rangelands	2.02341e+07	0.161849	0.356045	0.00228956	0.626539	0	0.44516	628.4	621.685	44.6176	40.7512	35.1832	2	0	0.995265	0.0723878	0.0638422	0.140755	0.060547	0.962527	0	0.0350769
Seminatural
51	Residential woodlands	3.85042e+06	0.0307989	52.8163	0.0962018	0.0694651	0.00216737	0.173307	1505.5	1862.09	53.867	150.782	101.095	28	0	1.0503	0.0376304	0.0769001	0.150758	0.0444263	0.698704	0	0.128368
52	Populated woodlands	9.86676e+06	0.0789224	8.71479	0.0398709	0.034729	0.00029819	0.0856976	1599.8	1726.69	27.584	115.047	87.3258	16	0	1.04359	0.0188767	0.0593658	0.0878814	0.0435667	0.823054	0	0.121645
53	Remote woodlands	2.65905e+06	0.0212692	0.776683	0.00277467	0.00928218	4.02e-06	0.0119281	2452.2	2536.39	8.61794	102.563	96.7127	6	0	1.03775	0.003499	0.0420406	0.046943	0.0388938	0.945023	0	0.0542248
54	Inhahited treeless & barren lands	4.65652e+06	0.0372467	5.39677	0.00403094	0.0890659	0	0.0861524	502.4	558.181	6.37576	50.3592	29.3043	9	0	1.06864	0.0116459	0.0745999	0.0902577	0.0631192	0.821372	0	0.123563
Wildlands
61	Wild woodlands	2.036e+07	0.162856	0.120809	0.000227655	0.00120363	0	0.00169488	581.75	626.289	0.196809	42.0868	40.5082	0	0	1.07219	0.000293405	0.0728206	0.0737063	0.0710463	1	0	0
62	Wild treeless & barren lands	1.48039e+07	0.118414	0.0171948	0	0.00027026	0	0.00102889	261.35	283.564	0.0279243	19.3693	18.8264	0	0	1.07318	0.000119018	0.074212	0.0770384	0.07251	1	0	0
	Global	1.25018e+08		3.3984	0.0223256	0.158678	3.938e-05	0.279369	828.6	853.029	43.3846	66.7259	46.3606	11	0	1.04263	0.0524598	0.072527	0.13639	0.0624011	0.863968	0	0.0793771
Hotspots (Mittermeier et al. 2004)		Ice-free land area		Population density	Land use			Habitat loss (HL)								ASR / N	ASL / N	ASI / N	(ASL + ASI) / N	IS / N	IS / ASI	OS / ASI	CS / ASI
num	Hotspot	106 km2	(%)	persons km-2	crops (%)	pasture (%)	urban (%)	(%)	N	ASR	ASL	ASI	IS	CS	OS	(%)	(%)	(%)	(%)	(%)	(%)	(%)	(%)
9	East Melanesian Islands	31165.6	0.000249288	15.9904	0.0271516	0.00181079	0.00066833	0.0293436	3561.65	3656.14	31.9491	137.516	129.525	8.5	0	1.02976	0.00889624	0.0386595	0.0475557	0.0363666	0.939318	0	0.0606821
23	Mountains of Southwest China	183116	0.00146471	11.7814	0.071538	0.510972	0	0.41509	2864.4	3108.16	204.029	536.808	513.483	25	0	1.12096	0.0728627	0.186824	0.259687	0.179657	0.962797	0	0.0372027
31	Wallacea	241530	0.00193195	49.8272	0.142067	0.0521404	0.0018422	0.184128	2811.1	2891.02	150.184	158.737	114.273	40	0	1.0258	0.0592231	0.0527294	0.111952	0.0379492	0.740719	0	0.241626
21	Mesoamerica	928604	0.00742774	34.6333	0.179848	0.185621	0.00260515	0.325597	2738.1	2690.2	268.704	260.071	130.554	27	0	1.00946	0.101778	0.101909	0.203687	0.0398851	0.785475	0	0.105733
3	Cape Floristic Region	103030	0.000824119	11.6326	0.0457174	0.746571	0	0.60402	2588.65	2583.18	364.68	229.712	194.387	16.5	0	0.952831	0.12709	0.0773177	0.204408	0.0720495	0.904296	0	0.0879735
29	Tropical Andes	1.47216e+06	0.0117756	15.7624	0.0458552	0.310337	0.00055481	0.281022	2584.1	2524.74	189.287	140.538	111.343	25	0	0.988017	0.0799902	0.0635171	0.143507	0.0387227	0.82832	0	0.15032
28	Sundaland	1.45705e+06	0.0116546	28.6336	0.207074	0.0433616	0.0005913	0.244079	2433	2403.15	197.198	131.925	94.7625	38	0	0.988739	0.0805187	0.0568594	0.137378	0.0389488	0.692253	0	0.242732
25	Philippines	249332	0.00199436	194.466	0.399321	0.0541657	0.00907592	0.442346	2397.4	2292.71	374.917	323.05	93.624	33.5	200	0.94578	0.160717	0.1341	0.294817	0.0390523	0.290293	0.603718	0.106713
1	Atlantic Forest	1.13737e+06	0.00909763	31.4179	0.163088	0.392102	0.00349198	0.456841	2282.3	2054.07	408.4	122.654	89.9219	24	0	0.896042	0.166185	0.057404	0.223589	0.0393997	0.720379	0	0.147853
30	Tumbes-Choco-Magdalena	154391	0.00123494	45.9257	0.0828222	0.312309	0.001891	0.307353	2275.5	2148.42	262.716	158.728	147.698	25.5	0	0.963587	0.0978471	0.0538541	0.151701	0.0400333	0.837554	0	0.113206
16	Japan	397379	0.00317856	184.019	0.118233	0.0103468	0.0202749	0.146902	2226.8	3054.4	58.1382	893.382	634.88	48	200	1.3658	0.0259731	0.389147	0.41512	0.285697	0.728345	0.219456	0.0535346
4	Caribbean Islands	186997	0.00149576	110.276	0.343298	0.231323	0.00848915	0.583356	2120.45	2017.94	347.548	342.378	212.222	35	200	1.02622	0.190589	0.153758	0.344347	0.126242	0.492901	0.433418	0.102466
14	Indo-Burma	2.32437e+06	0.0185922	70.5902	0.177207	0.0180493	0.00167622	0.21715	2097.7	2099.69	151.806	144.982	88.4493	37	0	1.01625	0.0662289	0.0640791	0.130308	0.0402873	0.676777	0	0.240012
11	Guinean Forests of West Africa	501774	0.0040136	67.0392	0.300519	0.265955	0.00387829	0.508767	2059.3	1864.71	354.604	119.978	82.6514	28	0	0.913794	0.192047	0.0562075	0.248254	0.0401357	0.724949	0	0.203546
12	Himalaya	656358	0.00525009	46.1372	0.184005	0.108499	0.00016274	0.417557	1940	2003.64	133.654	238.873	121.933	27	0	1.01939	0.0878957	0.139808	0.227704	0.0631779	0.878021	0	0.0971364
8	Coastal Forests of Eastern Africa	188175	0.00150518	25.4167	0.0346314	0.304495	0.000142175	0.250285	1896.2	1838.92	178.11	93.5829	77.2437	15	0	0.967885	0.0827899	0.0492001	0.13199	0.0407365	0.834179	0	0.165153
17	Madagascar and the Indian Ocean Islands	631116	0.00504818	18.5844	0.0406055	0.647916	6.877e-05	0.491019	1873.2	1733.12	294.69	120.013	93.1306	22	0	0.939061	0.129531	0.055433	0.184964	0.041966	0.800016	0	0.199984
18	Madrean Pine-Oak Woodlands	516416	0.00413072	22.9788	0.167405	0.265441	0.00110905	0.412548	1779.8	1929.76	168.345	264.844	232.592	26	0	1.08184	0.0967259	0.148883	0.245609	0.132696	0.897017	0	0.0793771
32	Western Ghats and Sri Lanka	155132	0.00124087	265.85	0.349217	0.0285077	0.00315896	0.380646	1667.35	1819.82	195.819	244.524	79.0507	41	0	1.01993	0.1149	0.141279	0.256179	0.0422306	0.596929	0	0.152518
5	Caucasus	485607	0.00388428	52.3479	0.311406	0.245544	0.00476485	0.548469	1606	2002.64	153.231	433.938	365.788	37.5	0	1.13647	0.101702	0.249378	0.351079	0.176179	0.645167	0	0.0928456
6	Cerrado	1.88897e+06	0.0151096	4.50164	0.0822904	0.48538	0.00033018	0.432367	1585.7	1526.47	153.376	82.2	66.7947	13	0	0.961843	0.0972973	0.0505855	0.147883	0.0421626	0.839966	0	0.147512
15	Irano-Anatolian	812107	0.00649589	41.6563	0.247324	0.410287	0.00238968	0.555729	1452.35	1597.24	169.651	322.384	259.07	48.5	0	1.11525	0.1174	0.234312	0.351712	0.19204	0.794122	0	0.152926
20	Mediterranean Basin	1.95186e+06	0.0156126	62.1871	0.343944	0.262152	0.00506241	0.590612	1436.2	1456.57	229.49	285.727	119.927	51	200	1.01116	0.162382	0.18818	0.350562	0.0837086	0.447766	0.449725	0.151004
10	Eastern Afromontane	896032	0.0071672	73.8472	0.142199	0.211298	0.000737005	0.318669	1431.55	1405.36	89.6947	100.292	68.752	29	0	1.00826	0.0724477	0.0679502	0.140398	0.043318	0.699635	0	0.264402
19	Maputaland-Pondoland-Albany	235782	0.00188597	40.5486	0.111104	0.490282	0.00241474	0.47307	1270.9	1289.82	126.712	97.0156	72.654	21	0	0.978931	0.0975026	0.0793167	0.176819	0.0598113	0.749832	0	0.1804
22	Mountains of Central Asia	791086	0.00632776	13.8273	0.0884589	0.574995	0.00028331	0.489398	1156.9	1196.36	104.773	94.4683	60.1294	26	0	0.998441	0.0899078	0.0817713	0.171679	0.0586302	0.695419	0	0.262964
2	California Floristic Province	271658	0.00217295	24.8822	0.0927378	0.182542	0.00977204	0.321485	1099	1367.01	73.7899	319.641	100.51	28	200	1.21329	0.0728835	0.302634	0.375517	0.0906152	0.509658	0.466992	0.0610311
24	New Zealand	264916	0.00211902	4.30665	0.119613	0.520136	0.00148116	0.513967	1061.2	1216.22	90.3129	248.585	219.344	30	0	1.14888	0.108561	0.228132	0.336693	0.201409	0.597703	0	0.110136
26	Southwest Australia	309059	0.00247211	0.271244	0.18119	0.358939	0	0.423101	985.75	988.306	104.158	102.724	88.0823	15	0	0.999127	0.104182	0.104734	0.208916	0.0893556	0.85233	0	0.146962
27	Succulent Karoo	53792.7	0.000430278	0.965463	0.00869187	0.88585	1.7185e-05	0.602885	887.6	856.294	87.1412	55.8349	49.8349	6	0	0.967048	0.0966756	0.0618907	0.158566	0.0561471	0.892693	0	0.107307
7	Chilean Winter Rainfall and Valdivian Forests	390156	0.00312078	5.0949	0.0129752	0.218416	0.000575645	0.1851	839.35	1118.56	35.2199	212.208	154.514	20.5	0	1.19534	0.0362172	0.223169	0.259387	0.196989	0.878546	0	0.090925
13	Horn of Africa	1.57202e+06	0.0125743	8.39509	0.0001556	0.489375	3.284e-05	0.34944	722	717.835	39.5085	48.4079	35.7163	8	0	1.01402	0.0574997	0.06332	0.12082	0.0485785	0.831728	0	0.160472
	Global	2.14385e+07	0.171483	29.1459	0.123093	0.265955	0.00112255	0.399241	1738.7	1741.75	157.184	136.4	89.4952	29	0	1.00426	0.0986545	0.0831348	0.181789	0.0453818	0.745347	0	0.149005
