# Supplementary material for: All Is Not Loss: Plant Biodiversity in the Anthropocene
Source: PubMed Central journal article supplement (PMC3260302; doi:10.1371/journal.pone.0030535), 2012-01-17
Supplement: pone.0030535.s003.pdf [file pone.0030535.s003.pdf]

Ellis, E.C, Antill, E.C. and H. Kreft (in review):  
**All is Not Lost: Plant Biodiversity in the Anthropocene**  
*PLoSone*

### **Appendix S3:** Maps and spatial data.

#### **Spatial Data**

For GIS analysis, in ESRI Shapefile format, downloadable at:  
<http://ecotope.org/anthromes/biodiversity/plants/data>

#### **Supplemental Maps** (separate pages below)

*All maps are Level 8 DGG grids (Appendix 1) in Eckert IV global equal area projection.*

**Figure 1:** Biomes (Olson *et al.* 2001)

**Figure 2:** Biogeographic Realms (Olson *et al.* 2001)

**Figure 3:** Biodiversity Hotspots (Mittermeier *et al.* 2005)

**Figure 4:** Anthromes (v2; Ellis *et al.* 2010)

**Figure 5:** Crop Species Richness (CS; based on Monfreda *et al.* 2008; Appendix 1).

**Figure 6:** Ornamental Species Richness (OS; prepared as detailed in Appendix 1).

**Figure 1. Biomes (Olson *et al.* 2001)**

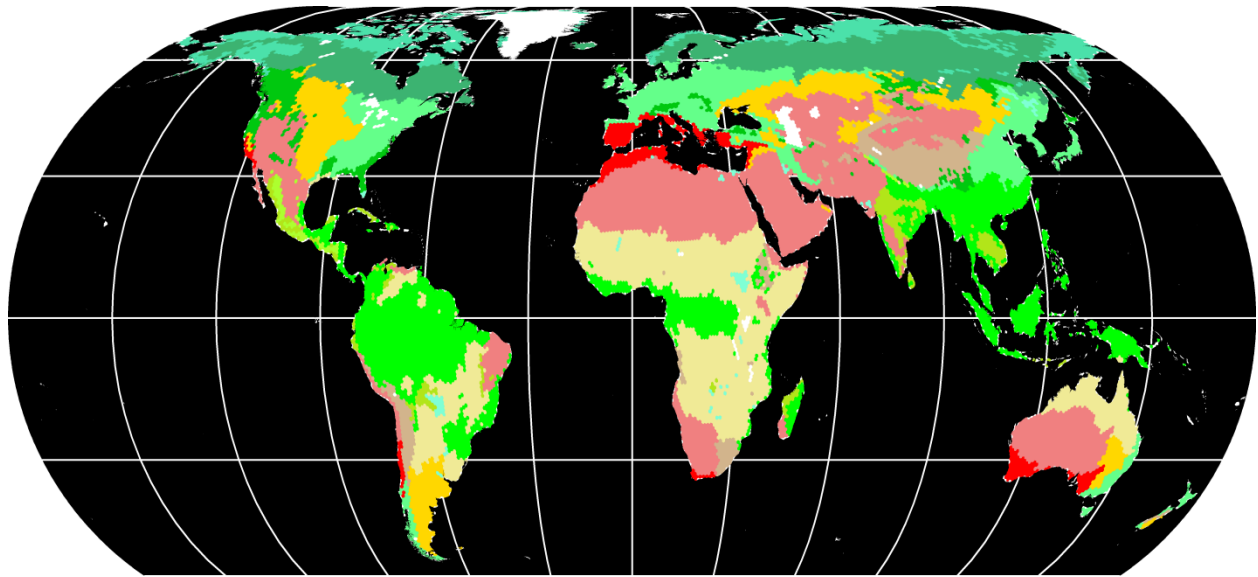

- |                                                                                                                                              |                                                                                                                                  |
|----------------------------------------------------------------------------------------------------------------------------------------------|----------------------------------------------------------------------------------------------------------------------------------|
|  Tropical & subtropical moist broadleaf forests             |  Temperate grasslands, savannas & shrublands    |
|  Tropical & subtropical coniferous forests                  |  Flooded grasslands & savannas                  |
|  Tropical & subtropical dry broadleaf forests               |  Montane grasslands & shrublands                |
|  Temperate broadleaf & mixed forests                        |  Tundra                                         |
|  Temperate coniferous forests                              |  Mediterranean forests, woodlands & shrublands |
|  Boreal forests                                           |  Deserts & xeric shrublands                   |
|  Tropical & subtropical grasslands, savannas & shrublands |                                                                                                                                  |

**Figure 2:** Biogeographic Realms (Olson *et al.* 2001)

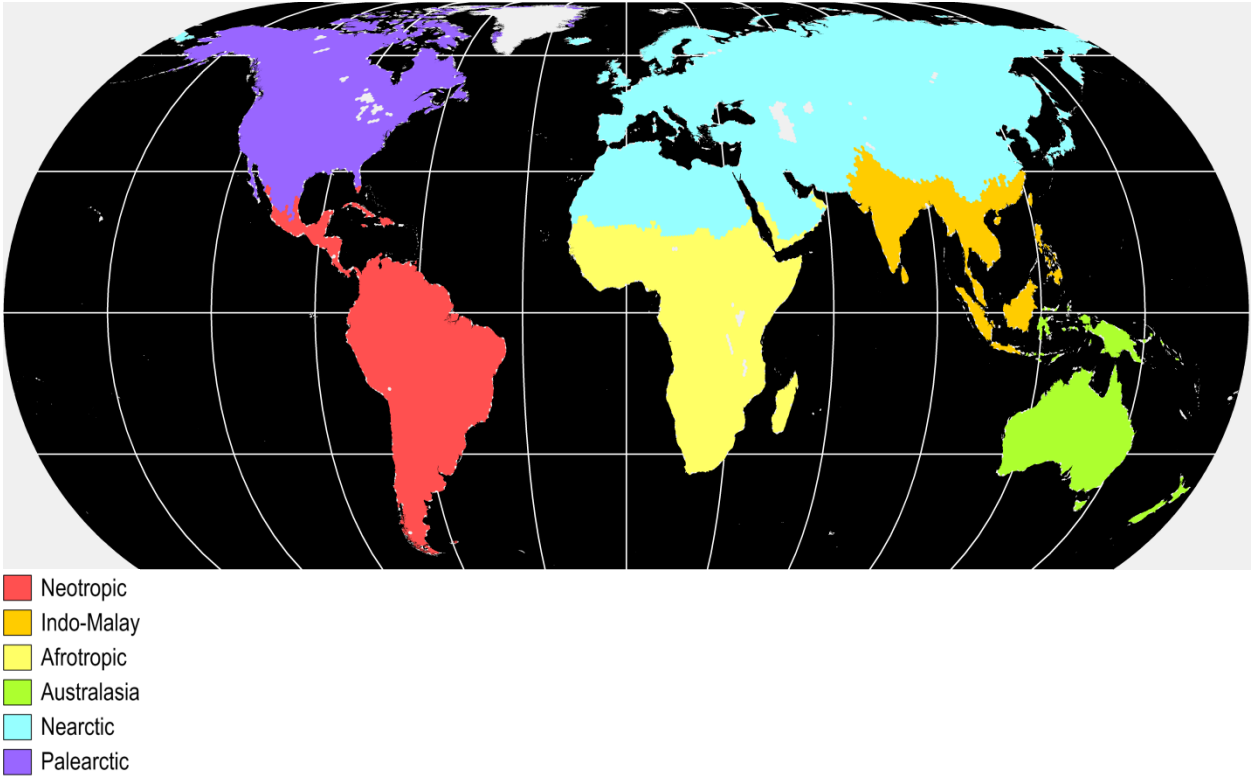

**Figure 3: Biodiversity Hotspots (Mittermeier *et al.* 2005)**

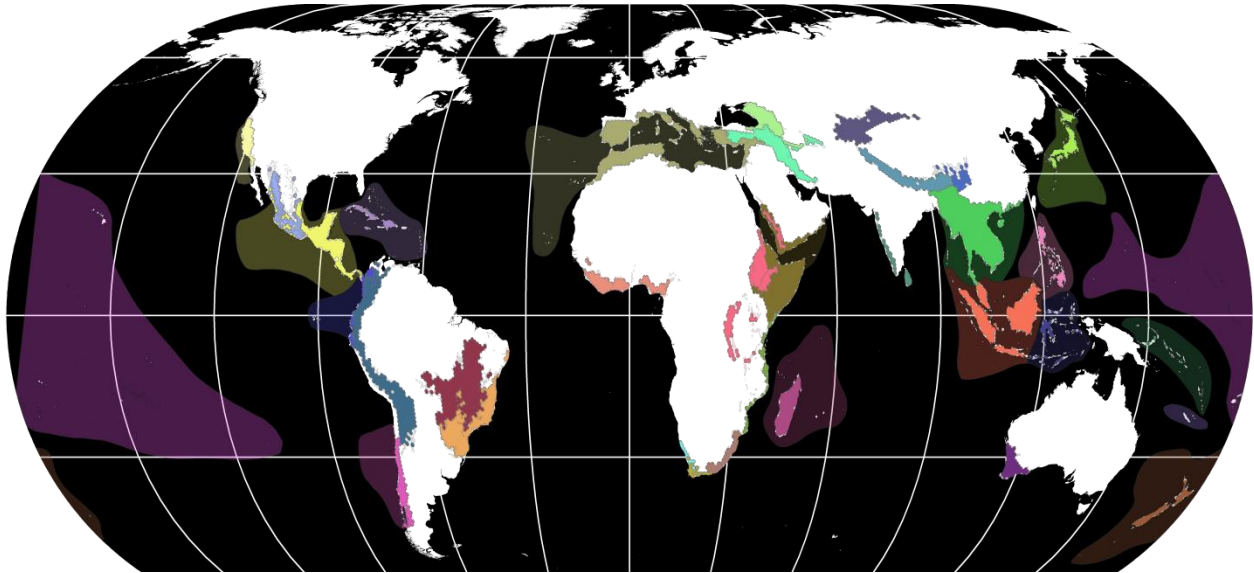

- |                                               |                                         |                             |
|-----------------------------------------------|-----------------------------------------|-----------------------------|
| Atlantic Forest                               | Horn of Africa                          | New Zealand                 |
| California Floristic Province                 | Indo-Burma                              | Philippines                 |
| Cape Floristic Region                         | Irano-Anatolian                         | Polynesia-Micronesia        |
| Caribbean Islands                             | Japan                                   | Southwest Australia         |
| Caucasus                                      | Madagascar and the Indian Ocean Islands | Succulent Karoo             |
| Cerrado                                       | Madrean Pine-Oak Woodlands              | Sundaland                   |
| Chilean Winter Rainfall and Valdivian Forests | Maputaland-Pondoland-Albany             | Tropical Andes              |
| Coastal Forests of Eastern Africa             | Mediterranean Basin                     | Tumbes-Choco-Magdalena      |
| East Melanesian Islands                       | Mesoamerica                             | Wallacea                    |
| Eastern Afrotropical                          | Mountains of Central Asia               | Western Ghats and Sri Lanka |
| Guinean Forests of West Africa                | Mountains of Southwest China            |                             |
| Himalaya                                      | New Caledonia                           |                             |

Figure 4: Anthromes (v2; Ellis *et al.* 2010)

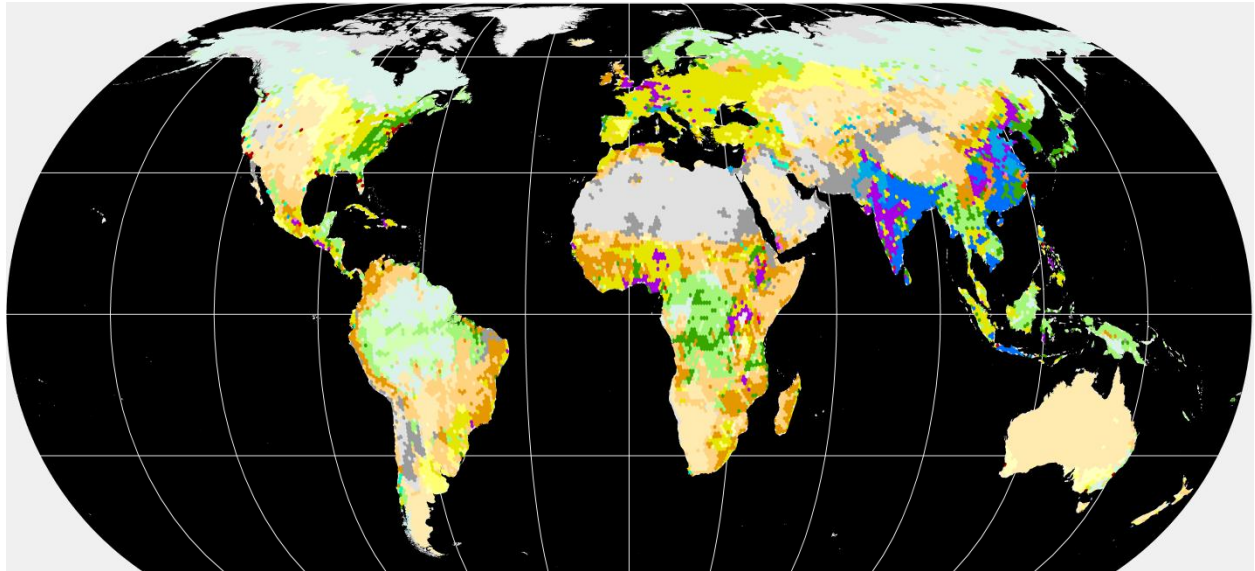

**Dense Settlements**

- Urban
- Mixed settlements

**Villages**

- Rice villages
- Irrigated villages
- Rainfed villages
- Pastoral villages

**Croplands**

- Residential irrigated croplands
- Residential rainfed croplands
- Populated croplands
- Remote croplands

**Rangelands**

- Residential rangelands
- Populated rangelands
- Remote rangelands

**Seminatural**

- Residential woodlands
- Populated woodlands
- Remote woodlands
- Inhabited treeless & barren

**Wildlands**

- Wild woodlands
- Wild treeless & barren

**Figure 5:** Crop Species Richness (CS; based on Monfreda *et al.* 2008; Appendix 1).

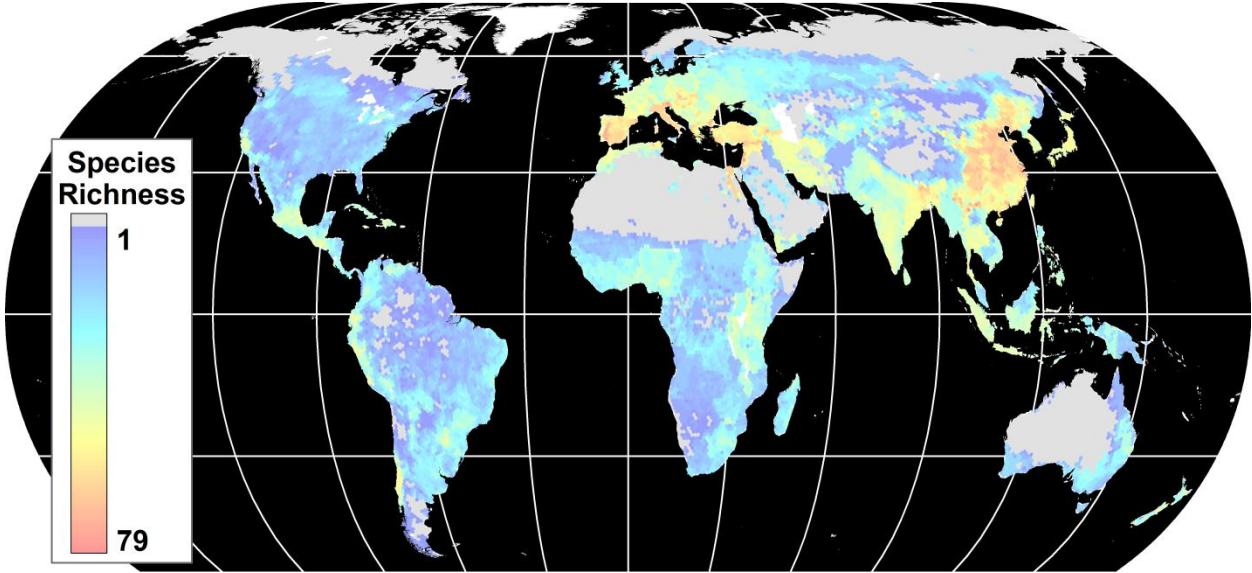

**Figure 6:** Ornamental Species Richness (OS; prepared as detailed in Appendix 1).

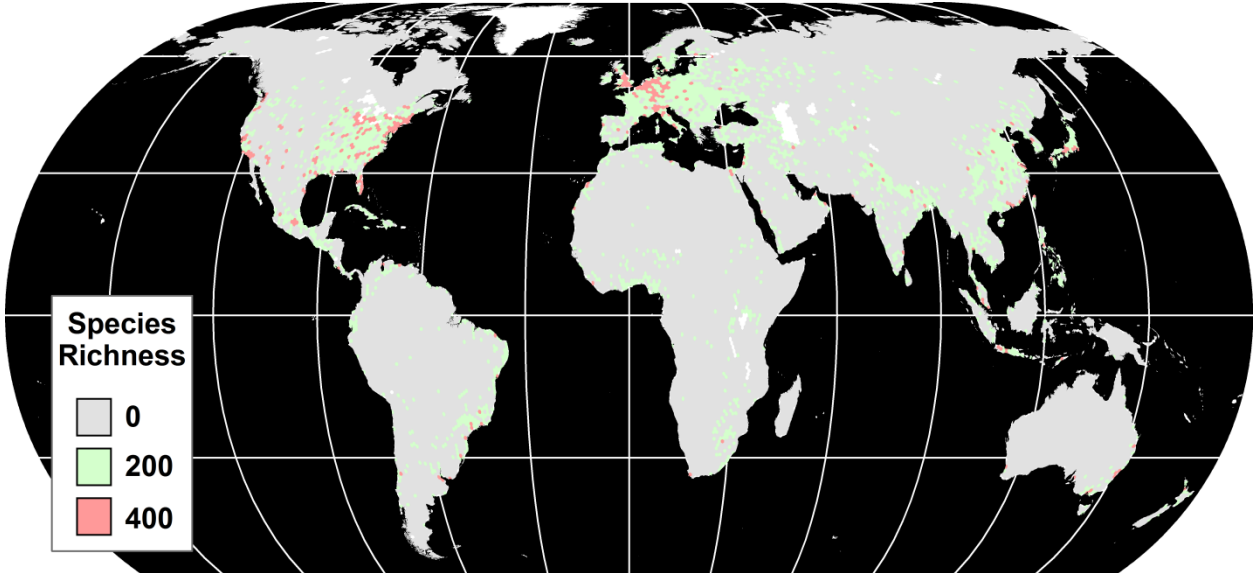

### **References Cited**

- Ellis EC, Klein Goldewijk K, Siebert S, Lightman D, Ramankutty N (2010) Anthropogenic transformation of the biomes, 1700 to 2000. *Global Ecology and Biogeography*, **19**, 589-606.
- Mittermeier RA, Gil PR, Hoffman M *et al.* (2004) *Hotspots Revisited: Earth's Biologically Richest and Most Endangered Terrestrial Ecoregions*, Conservation International.
- Monfreda C, Ramankutty N, Foley JA (2008) Farming the planet: 2. Geographic distribution of crop areas, yields, physiological types, and net primary production in the year 2000. *Global Biogeochemical Cycles*, **22**, GB1022.
- Olson DM, Dinerstein E, Wikramanayake ED *et al.* (2001) Terrestrial ecoregions of the world: a new map of life on Earth. *BioScience*, **51**, 933-938.
